# Supplementary material
Source: PubMed Central journal article supplement (PMC4442740)

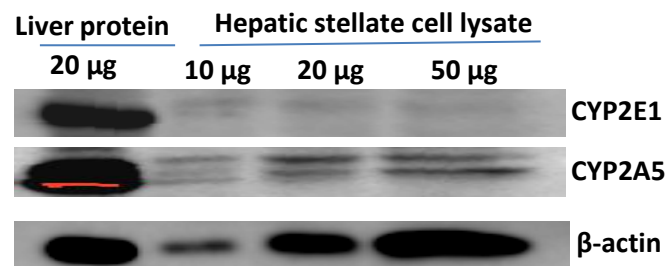

Supplement: NIHMS669957-supplement-1.pdf [file NIHMS669957-supplement-1.pdf]
